# Supplementary material for: Relationship between cricket participation, health and well-being: scoping review protocol
Source: PubMed Central journal article supplement (PMC6858230; doi:10.1136/bmjopen-2019-032070), 2019-11-10
Supplement: bmjopen-2019-032070supp001.pdf [file bmjopen-2019-032070supp001.pdf]

Appendix ##: Example of full search strategy.

Medline and PubMed:

*cricket\** NOT (*cadaver\** or *"in situ"* or *"in vitro"* or *animals* or *insects*)
